# Supplementary material for: Photo-responsive reversible assembly of gold nanoparticles coated with pillar[5]arenes
Source: Royal Society of Chemistry journal article supplement (doi:10.1039/c4cc09778e), 2015-01-01
Supplement: c4cc09778e1.pdf [file c4cc09778e1.pdf]

# Photo-responsive reversible assembly of pillar[5]arenes stabilized gold nanoparticles

Qizhong Zhou\*, Bin Zhang, Deman Han, Rener Chen\*, Fangli Qiu, Jiashou Wu and Huajiang Jiang\*

Department of Chemistry, Taizhou University, Taizhou 318000, P. R. China; Fax: +86-576-8866-0177;

Tel: +86-576-8866-0177;

E-mail: [qizhongzhou@tzc.edu.cn](mailto:qizhongzhou@tzc.edu.cn); [cre@tzc.edu.cn](mailto:cre@tzc.edu.cn); [jhj@tzc.edu.cn](mailto:jhj@tzc.edu.cn).

## Electronic Supplementary Information (10 pages)

|    |                                                                                              |
|----|----------------------------------------------------------------------------------------------|
| 1. | <i>Materials and methods</i>                                                                 |
| 2. | <i>Synthesis of <b>SH-P5</b> and guest molecule</i>                                          |
| 3. | <i>Synthesis of <b>SH-P5</b> stabilized gold nanoparticles <b>AuNPs</b></i>                  |
| 4. | <i>Host-guest propoties of <b>DEP</b> and <b>G<sub>1</sub></b></i>                           |
| 5. | <i>Photo-responsive transformation between <b>G<sub>1</sub></b> and <b>G<sub>2</sub></b></i> |
| 6. | <i>References</i>                                                                            |

## 1. Materials and methods

1,4-dimethoxybenzene, 1,4-dibromo butane, 4-methoxyphenol, boron trifluoride etherate, triformol, thiourea, NaOH, anthrone, 1,10-dibromodecane, and trimethylamine solution were reagent grade and used as received. Solvents were either employed as purchased or dried according to procedures described in the literatures.  $^1\text{H}$  NMR spectra were collected on a Varian Unity INOVA-400 spectrometer (Bruker) with internal standard TMS.  $^{13}\text{C}$  NMR spectra were recorded on a Varian Unity INOVA-400 spectrometry at 100 MHz. Mass spectra were obtained on a Bruker Esquire 3000 plus mass spectrometer (Bruker-Franzen Analytik GmbH Bremen, Germany) equipped with an ESI interface and an ion trap analyzer. HRMS were obtained on a Bruker 7-Tesla FT-ICRMS equipped with an electrospray source (Billerica, MA, USA). The melting points were collected on a SHPSIC WRS-2 automatic melting point apparatus. UV–Vis spectroscopy was measured on a Shimadzu UV-2501 PC UV–Vis spectrometer. The spectral background absorption was subtracted by means of the UV–Vis spectrum of water. FT-IR spectra were taken with potassium bromide pellets on a TENSOR 27 spectrometer. Scanning electron microscopy (SEM) investigations were carried out on a JEOL 6390LV instrument. The SEM samples were prepared on clean Si substrates. Each sample solution was deposited onto a Si substrate, placed in a refrigerator for 30 min, and freeze-dried in a freeze-drying machine at  $-20\text{ }^\circ\text{C}$  under reduced pressure. Transmission electron microscopy (TEM) studies were obtained using a JEM-1200EX instrument with an accelerating voltage of 80 kV. Dynamic light scattering (DLS) measurements were performed on a goniometer ALV/CGS-3 using a UNIPHASE He-Ne laser operating at 632.8 nm. XRD data were obtained with a graphite monochromatic device and Cu  $\text{K}\alpha$  radiation ( $\lambda = 0.15406\text{ nm}$ ) on the D8 Advance superspeed powder diffractometer (Bruker), operated in the  $\theta:2\theta$  mode primarily in the  $20\text{--}85^\circ$  ( $2\theta$ ) range and step-scan of  $2\theta = 0.04^\circ$ , the tube voltage was 80 kV.

## 2. Synthesis of **SH-P5** and guest molecule

### 2.1. Synthesis of compound **SH-P5**

**Scheme S1.** Synthetic route to **SH-P5**

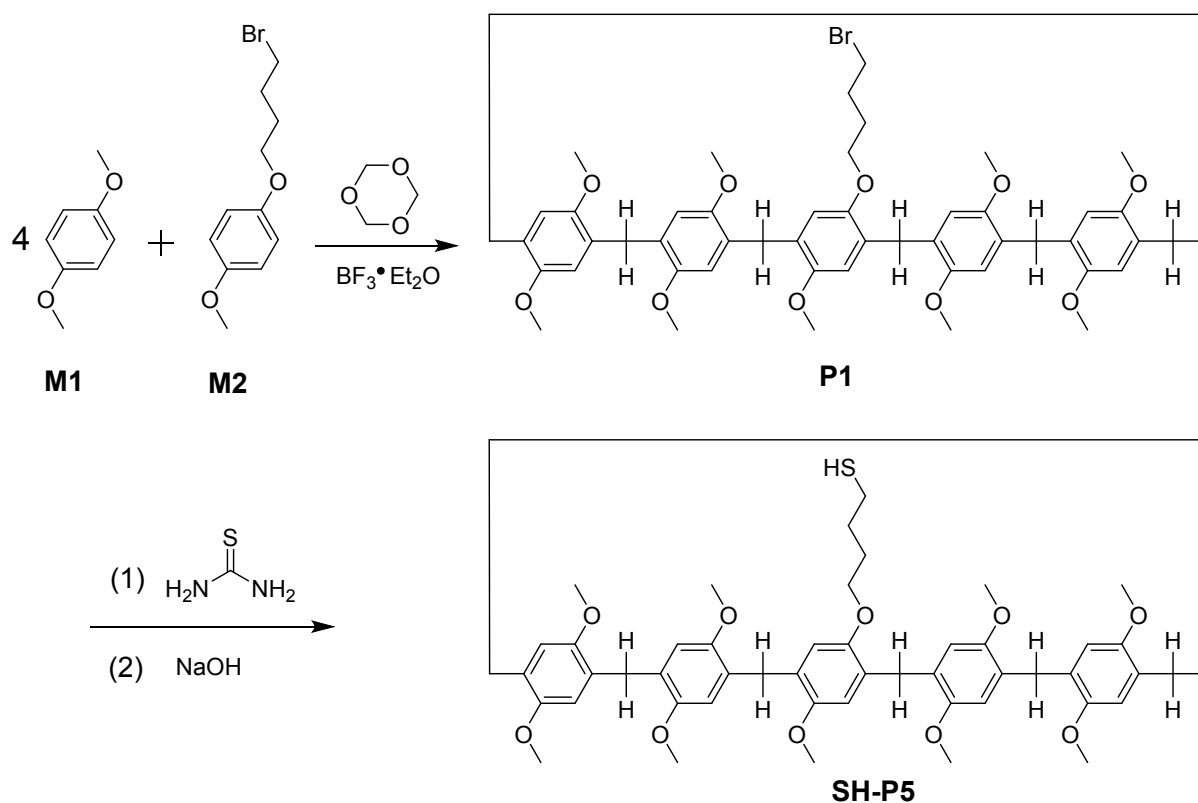

Compound **P1**:<sup>S1</sup> A solution of **M2** (2.59 g, 10.0 mmol), **M1** (11.1 g, 80.0 mmol) and triformol (5.45 g, 180 mmol) in  $\text{ClCH}_2\text{CH}_2\text{Cl}$  (250 mL) was stirred at room temperature, 11.3 mL  $\text{BF}_3 \cdot \text{Et}_2\text{O}$  (12.8 g, 90 mmol) was added into the solution and kept stirring for about 20 minutes. Then the solvent was evaporated under reduced pressure and the residue was dissolved in  $\text{CH}_2\text{Cl}_2$ . The resultant solution was washed with  $\text{H}_2\text{O}$ . The organic phase was collected, dried over anhydrous  $\text{Na}_2\text{SO}_4$  and concentrated to afford the crude product, which was isolated by flash column chromatography to give **P1** (3.50 g, 40%) as a white solid, mp 73.6–74.1 °C. The proton NMR spectrum of **P1** is shown in Fig. S1.  $^1\text{H}$  NMR (400 MHz,  $\text{CDCl}_3$ , 298 K)  $\delta$  (ppm): 6.76 (m, 9H), 6.71 (s, 1H), 3.82 (t,  $J = 8$  Hz, 2H), 3.78 (d,  $J = 4$  Hz, 10H), 3.66–3.64 (m, 27H), 3.24 (s, 4H), 1.84 (s, 2H), 1.78 (s, 2H).

Compound **SH-P5**: A solution of **P1** (0.87 g) and excess thiourea (0.2 g) was refluxed in DMF under nitrogen atmosphere for 8 hours. Then 1.00 g NaOH was added into the mixture and the mixture was refluxed for another 2 hours, The reaction mixture was evaporated to provide a crude product, which was purified by column chromatography (eluent: petroleum ether/ethyl acetate, 50:1) to afford **SH-P5** (0.73 g, 92%). Mp: 120.3–121.5 °C. The  $^1\text{H}$  NMR spectrum of **SH-P5** is shown in Fig. S2.  $^1\text{H}$  NMR (400 MHz,  $\text{CDCl}_3$ , rt)  $\delta$  (ppm): 6.86–6.66 (m, 10H), 4.44 (s, 2H), 3.87–3.82 (m, 27H), 3.80–3.77 (m, 10H), 3.75–3.67 (m, 2H), 2.75 (s, 2H), 1.82–1.78 (m, 2H). The  $^{13}\text{C}$  NMR spectrum of **SH-P5** is shown in Fig. S3.  $^{13}\text{C}$  NMR (100 MHz,  $\text{CDCl}_3$ , rt)  $\delta$  (ppm): 150.86, 150.80, 150.71, 150.67, 149.91, 128.57, 128.28, 128.21, 128.13, 114.83, 114.40, 114.10, 114.01, 113.84, 113.77, 67.44, 55.96, 55.80, 55.76, 55.71, 33.24, 29.79, 29.73, 29.60, 29.36, 28.91, 28.36. LRESIMS is shown in Fig. S4:  $m/z$  428.2 [ $\text{M} - \text{H} + \text{Cl}$ ] $^-$ . HRESIMS:  $m/z$  calcd for [ $\text{M} + \text{Na}$ ] $^+$   $\text{C}_{48}\text{H}_{56}\text{NaO}_{10}\text{S}$ , 847.3486, found 847.3486; error 0 ppm.

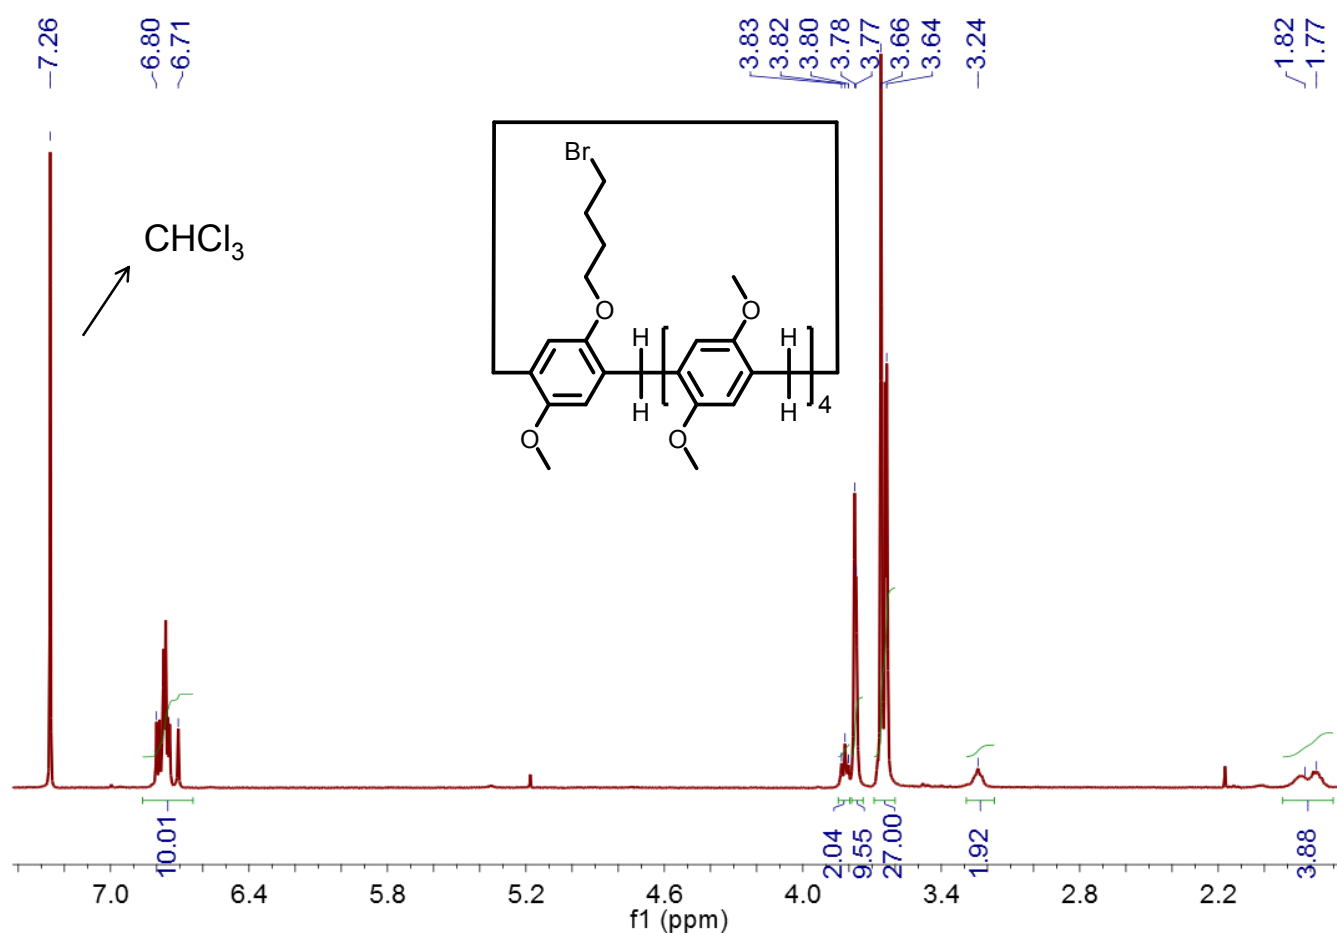

**Fig. S1**  $^1\text{H}$  NMR spectrum (400 Hz,  $\text{CDCl}_3$ , rt) of **P1**.

**Fig. S2**  $^1\text{H}$  NMR spectrum (400 Hz,  $\text{CDCl}_3$ , rt) of **SH-P5**.

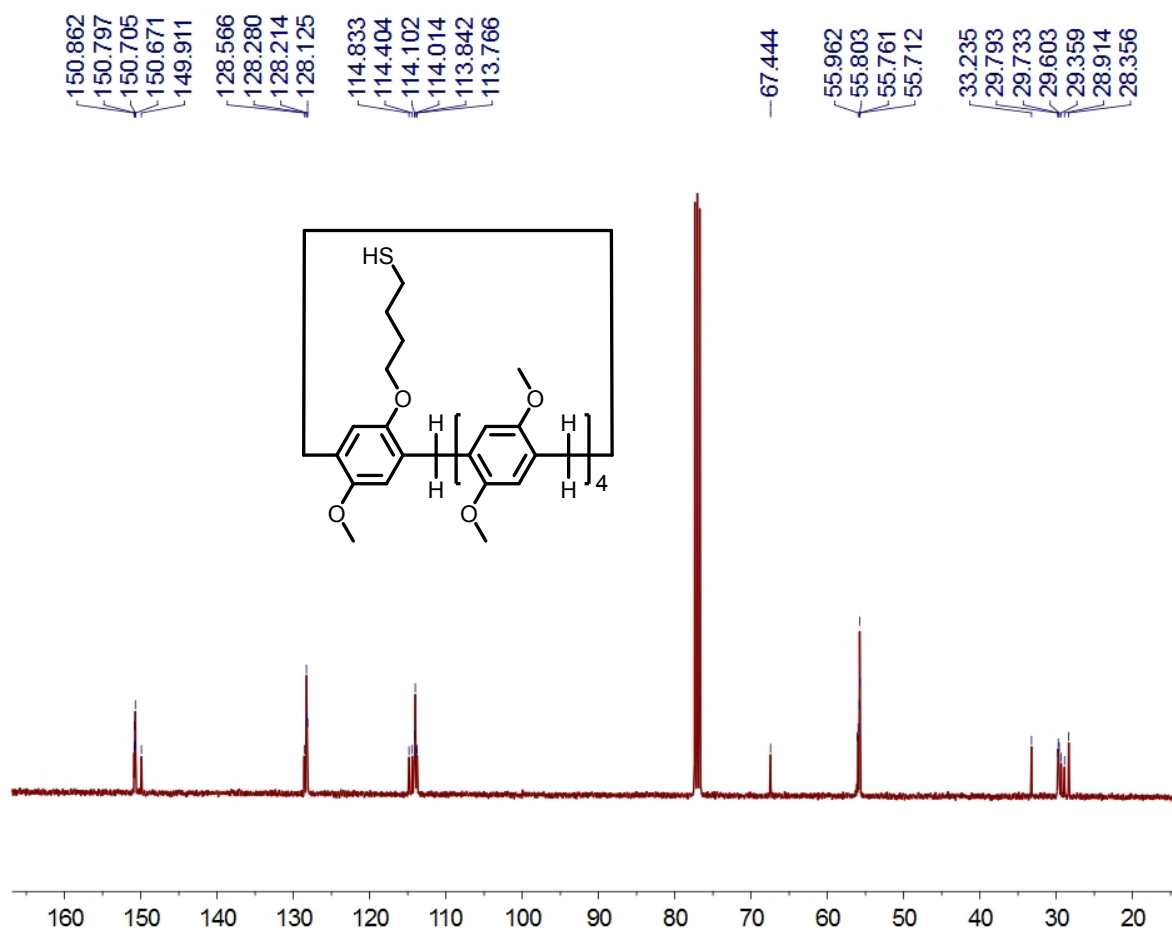

**Fig. S3**  $^{13}\text{C}$  NMR spectrum (100 Hz,  $\text{CDCl}_3$ , rt) of **SH-P5**.

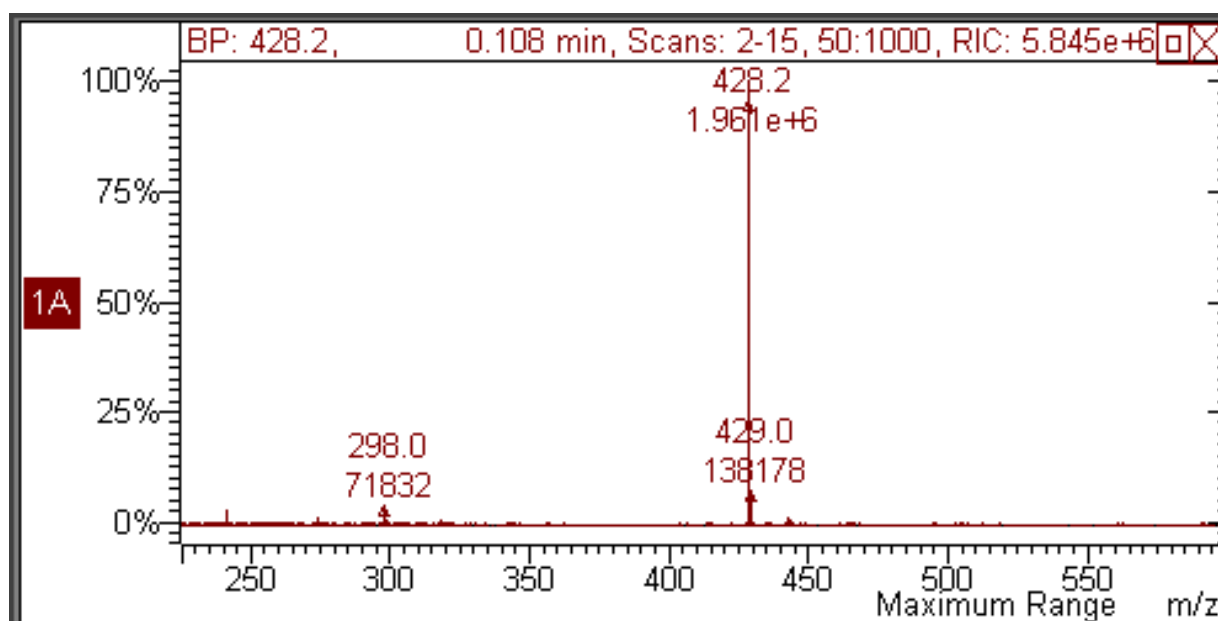

**Fig. S4** Electrospray ionization mass spectrum of **SH-P5**. Assignment of the main peak:  $m/z$  428.2 [ $M - H + Cl$ ] $^{2-}$  (100%).

## 2.2. Synthesis of compound **G**<sub>1</sub>

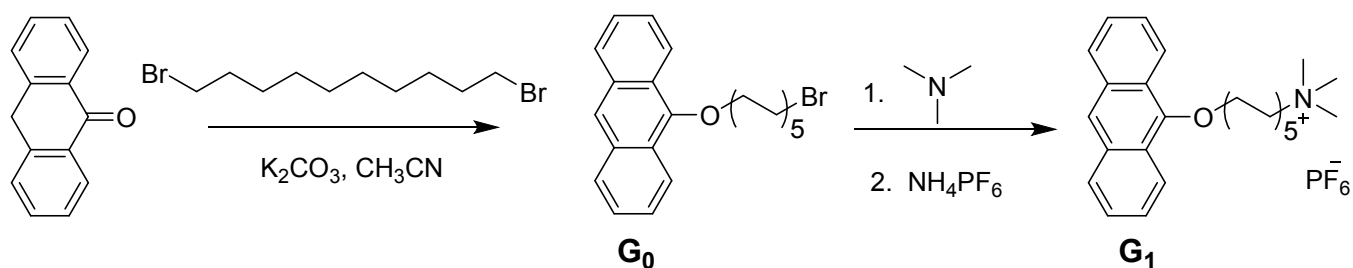

Anhydrous potassium carbonate (5.5 g, 40 mmol) was added to a solution of anthranone (3.9 g, 20 mmol) and 1,10-dibromodecane (30.0 g, 100 mmol) in dry acetonitrile (500 mL). The mixture was stirred at 80 °C for 24 hours under nitrogen atmosphere to obtain **G**<sub>0</sub>. Then 0.43 g **G**<sub>0</sub> and excess trimethylamine were refluxed in CH<sub>3</sub>CH<sub>2</sub>OH for 2 hours, the reaction mixture was poured in water and we added NH<sub>4</sub>PF<sub>6</sub> to get **G**<sub>1</sub> as a white solid (0.5 g, 94%). Mp: 163.2–165.8 °C. The <sup>1</sup>H NMR spectrum of **G**<sub>1</sub> is shown in Figure S5. <sup>1</sup>H NMR (400 MHz, CDCl<sub>3</sub>, rt) δ (ppm): 8.21 (s, 2H), 8.00 (s, 1H), 7.98 (s, 2H), 7.47-7.45 (m, 4H), 4.19 (t,  $J = 6$  Hz, 2H), 3.55-3.53 (m, 2H), 3.43-3.39 (m, 10H), 2.05-2.03 (m, 2H), 1.70 (s, 14H). The <sup>13</sup>C NMR spectrum of **G**<sub>1</sub> is shown in Fig. S6. <sup>13</sup>C NMR (100 MHz, CDCl<sub>3</sub>, rt) δ (ppm): 154.78, 129.90, 128.79, 126.53, 126.23, 124.46, 123.88, 76.97, 71.39, 66.82, 54.77, 28.95, 28.71, 27.80, 26.49, 23.59. LRESIMS is shown in Fig. S7:  $m/z$  392.3 [ $M - PF_6$ ] $^+$ . HRESIMS:  $m/z$  calcd for [ $M - PF_6$ ] $^+$  C<sub>27</sub>H<sub>38</sub>NO, 392.2948, found 392.2951; error 0.76 ppm.

**Fig. S5**  $^1\text{H}$  NMR spectrum (400 MHz,  $\text{CDCl}_3$ , rt) of **G<sub>1</sub>**.

**Fig. S6**  $^{13}\text{C}$  NMR spectrum (100 MHz,  $\text{CDCl}_3$ , rt) of **G<sub>1</sub>**.

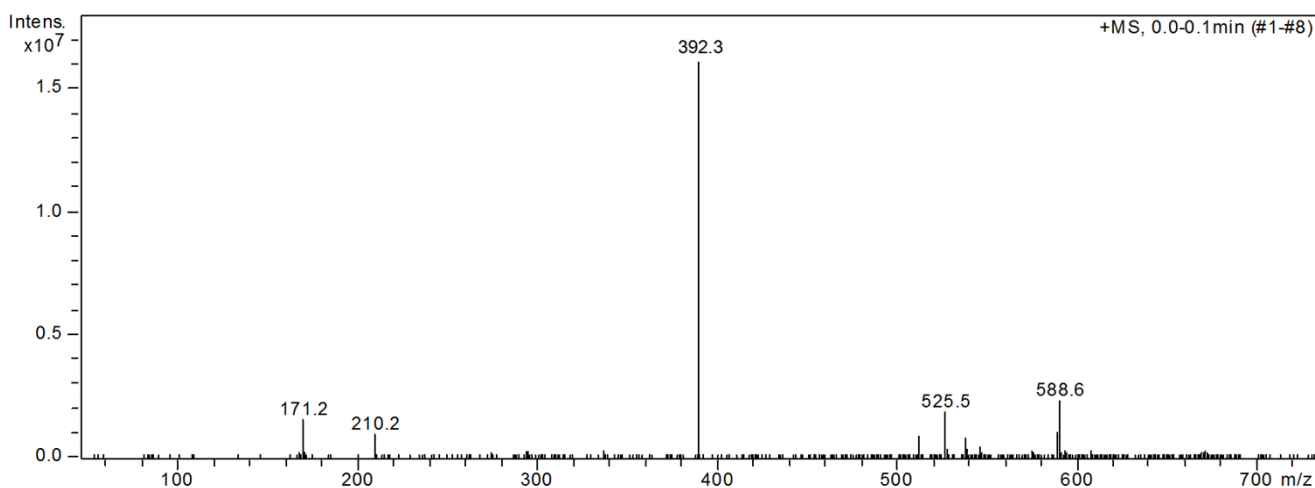

**Fig. S7** Electrospray ionization mass spectrum of **G<sub>1</sub>**. Assignment of the main peak:  $m/z$  392.3 [**M** – PF<sub>6</sub>]<sup>+</sup> (100%).

### 3. Synthesis and characterization of **SH-P5**-stabilized gold nanoparticles

**AuNPs** were synthesized using methods reported previously.<sup>S2</sup> A 100 mg of HAuCl<sub>4</sub> was dissolved in 1 L of H<sub>2</sub>O and heated to boiling under stirring. A 30 mL of sodium citrate (1 wt %) solution was then quickly injected. The reaction mixture was refluxed for 30 min. The **AuNPs** were then collected by centrifugation.

The surface modification of 5 nm **AuNPs** was performed using interfacial ligand-exchange method. Typically, 5 mg of **SH-P5** was first dissolved in 10 mL of toluene or chloroform which is immiscible with water. After adding this solution to an aqueous solution of 5 nm **AuNPs**, the mixture was sonicated for 2 h under room temperature. The formed emulsion was kept undisturbed overnight until the water phase became colorless. The oil phase containing **AuNPs** was then collected and dried under vacuum at 40 °C.

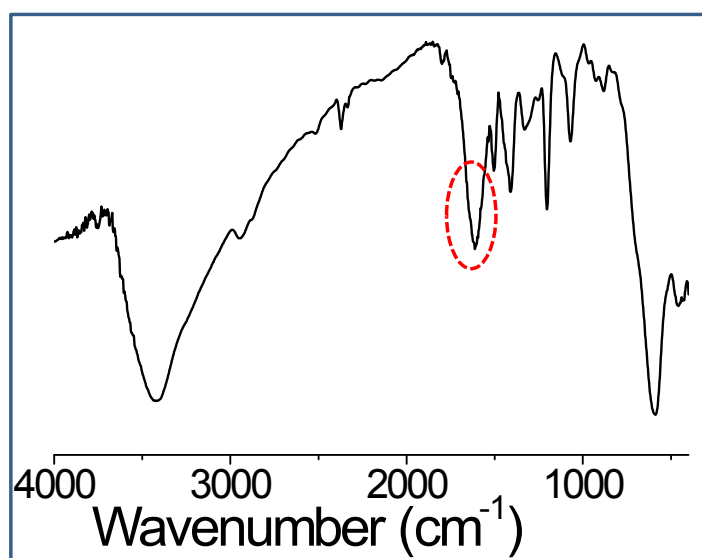

**Figure S8.** Fourier transform IR spectra of **SH-P5** stabilized **AuNPs**



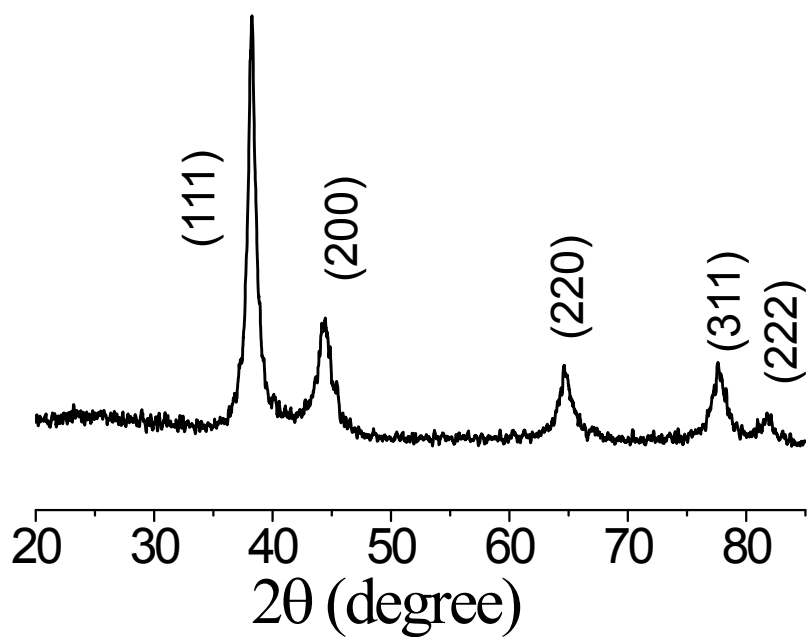

Fig. S9 XRD study of SH-P5 stabilized AuNPs.

#### 4. Host-guest propeties of **DEP** and **G<sub>1</sub>**

Due to **DEP** can easily dissolve in  $\text{CDCl}_3$ , so we firstly investigate the host-guest interaction between **DEP** and **G<sub>1</sub>**.

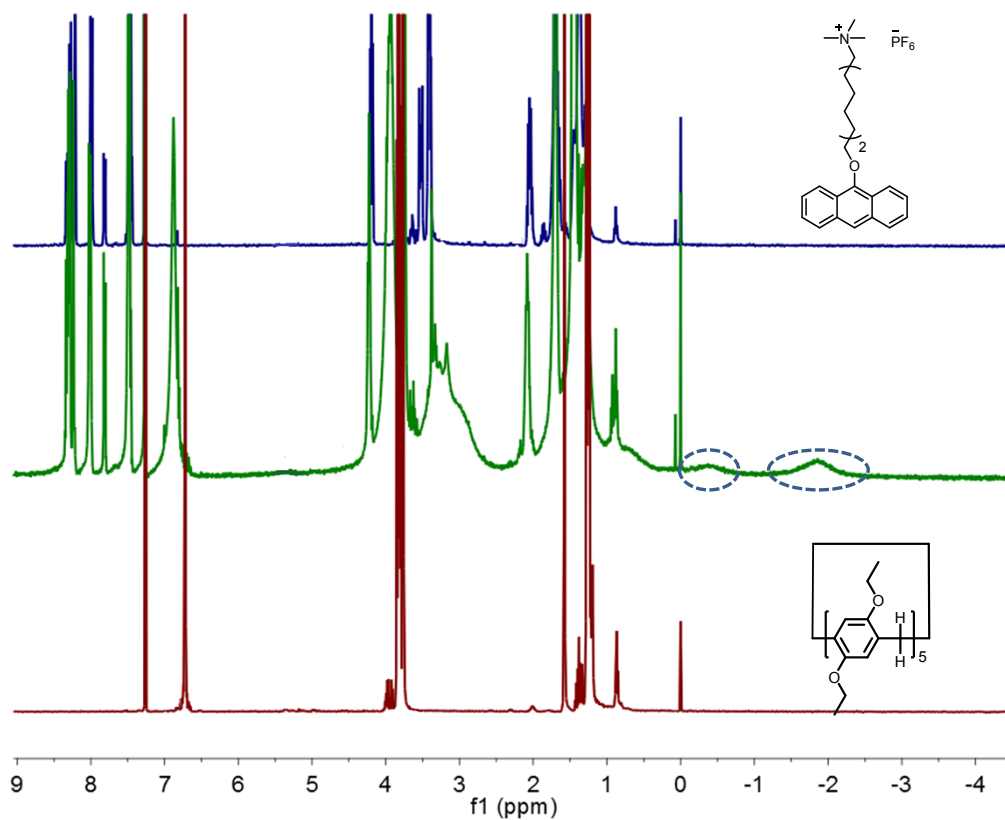

Fig. S10 <sup>1</sup>H NMR spectrum (400 MHz,  $\text{CDCl}_3$ , rt) of **G<sub>1</sub>**, **DEP-G<sub>1</sub>**, and **DEP**.

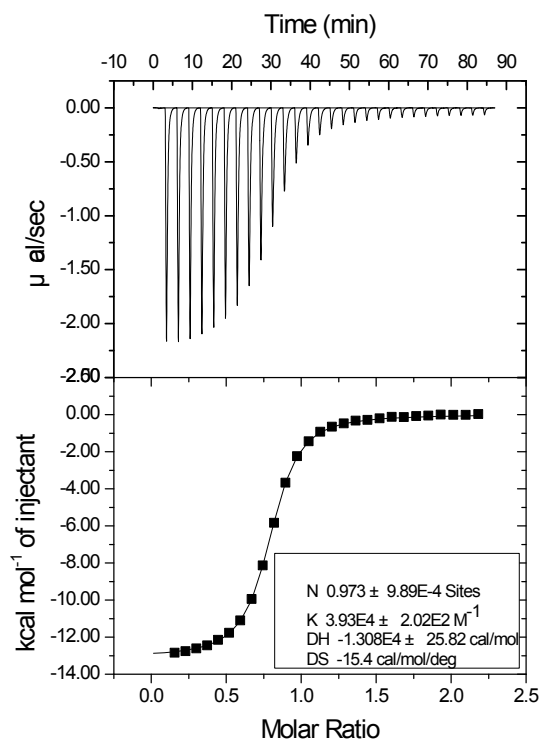

**Fig. S11** ITC study of the host-guest property of **DEP-G<sub>1</sub>**.

5. Photo-responsive transformation between **G<sub>1</sub>** and **G<sub>2</sub>**

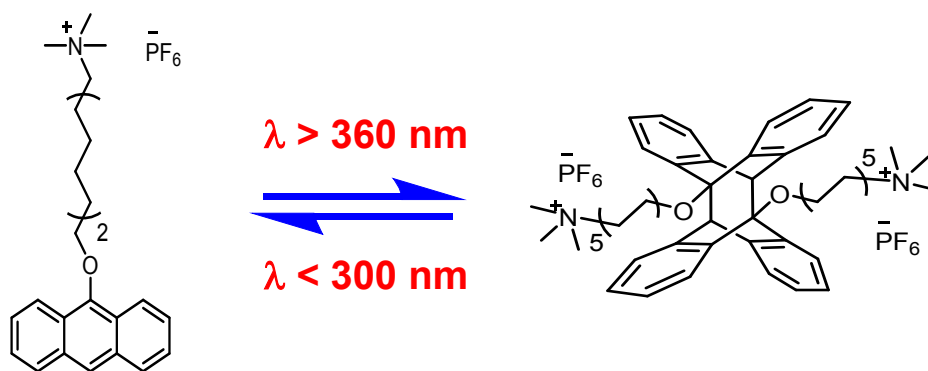

**Scheme S2** Photo-induced transformation between **G<sub>1</sub>** and **G<sub>2</sub>**.

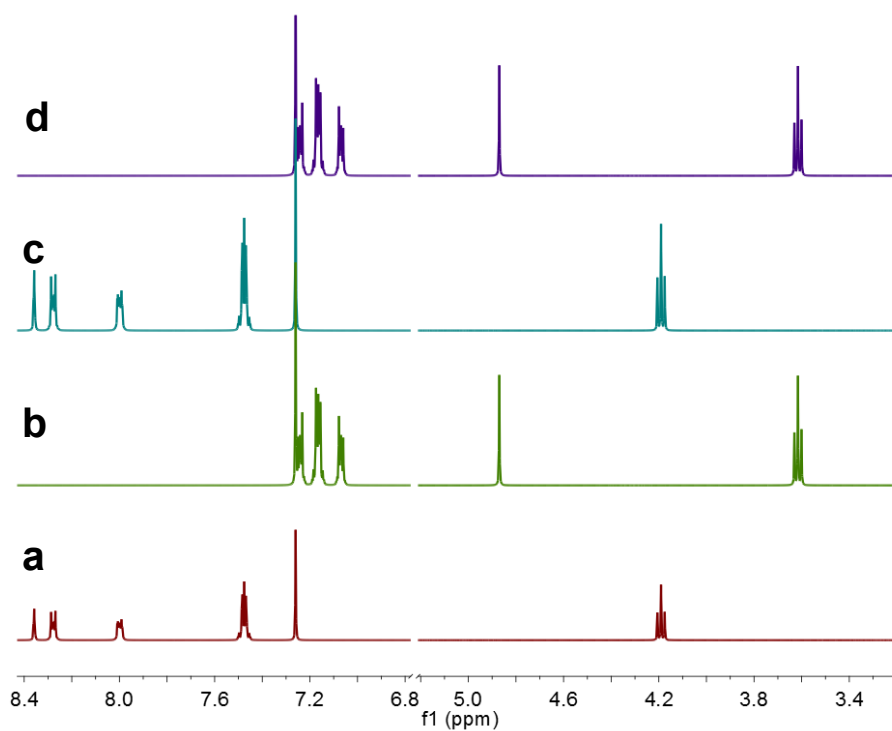

**Fig. S12** Partial <sup>1</sup>H NMR spectra (500 MHz, CDCl<sub>3</sub>, 293 K): (a) G<sub>1</sub>; (b) irradiation of (a) for 12 h ( $\lambda > 360$  nm); (c) heating or irradiation ( $\lambda < 300$  nm) of (b) for 24 h; (d) irradiation of (c) for 12 h ( $\lambda > 360$  nm).

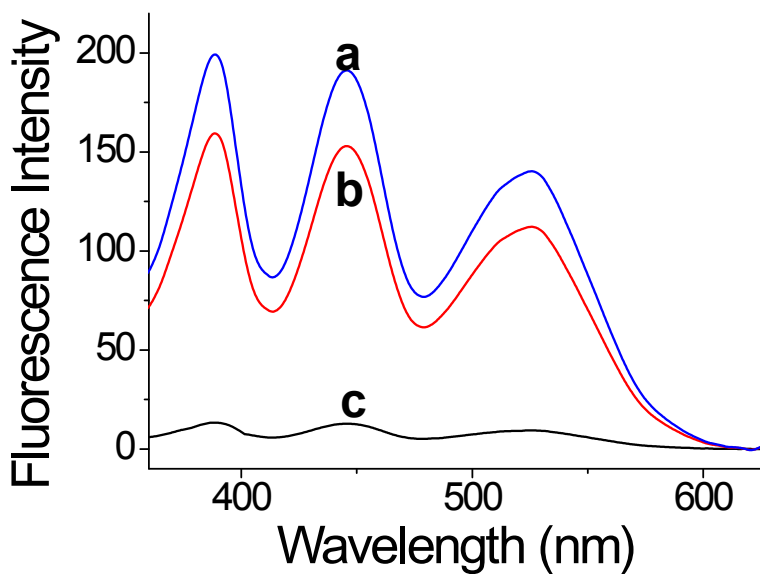

**Fig. S13** Fluorescence spectra: (a) G<sub>1</sub>; (b) irradiation of (b) for 6 h at  $\lambda < 300$  nm; (c) irradiation of (a) for 24 h at  $\lambda > 360$  nm.

**Fig. S14** The UV–Vis absorption of 2,6-dichloro-4-nitrophenol (black line) and after reduction o by excess NaBH<sub>4</sub> with **SH-P5** stabilized gold nanoparticles as catalyst (red line).

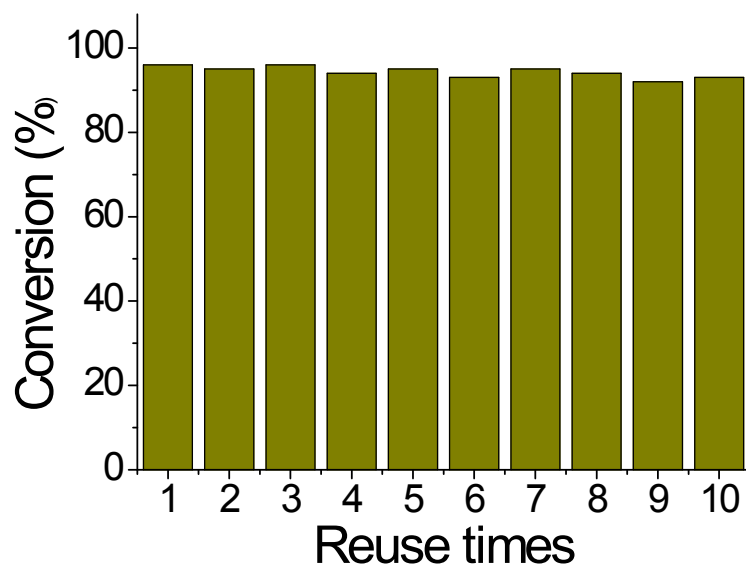

**Fig. S15** Conversion of 2,6-dichloro-4-nitrophenol catalyst by **SH-P5** stabilized gold nanoparticles against reuse time.

**Fig. S16** Calculated structural parameters of pillar[5]arene stabilized gold nanoparticle.  $4\pi r_1^2 = n\pi r_2^2$ , so  $n = 85$ . There is about 85 pillar[5]arene molecules on one gold nanoparticles. The diameter of pillar[5]arene was reported before.<sup>S3</sup>

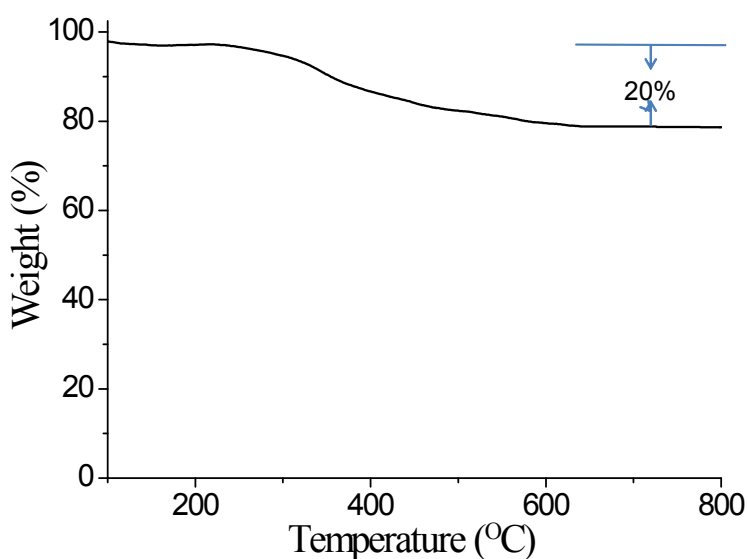

**Fig. S17** TGA study of **SH-P5** stabilized gold nanoparticles.

#### 6. References:

- S1 J. Yang, Z. Li, Y. Zhou and G. Yu, *Polym. Chem.* 2014, **5**, 6645.
- S2 M. N. Martin, J. I. Basham, P. Chando and S. K. Eah, *Langmuir* 2010, **26**, 7410.
- S3 C. Han, F. Ma, Z. Zhang, B. Xia, Y. Yu and F. Huang, *Org. Lett.* 2010, **12**, 4360.
